# Supplementary material for: Biogenic Synthesis, Characterization, and In Vitro Biological Evaluation of Silver Nanoparticles Using Cleome brachycarpa
Source: MDPI journal article supplement (doi:10.3390/plants12071578), 2023-04-06

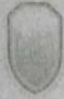

# University of Science & Technology, Bannu

Main Campus, Township Bannu, Ph # 0928-633321, www.ustb.edu.pk

## Department of Botany

### IDENTIFICATION CERTIFICATE

Certified that following plants are identified and verified by the undersign based on their vegetative and floral characters.

1. *Cleome viscosa* Voucher No# Cv-C1
2. *Cleome brychycarpa* Voucher No# Cb-C2

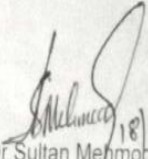  
Prof. Dr. Sultan Mehmood  
Department of Botany  
UST Bannu

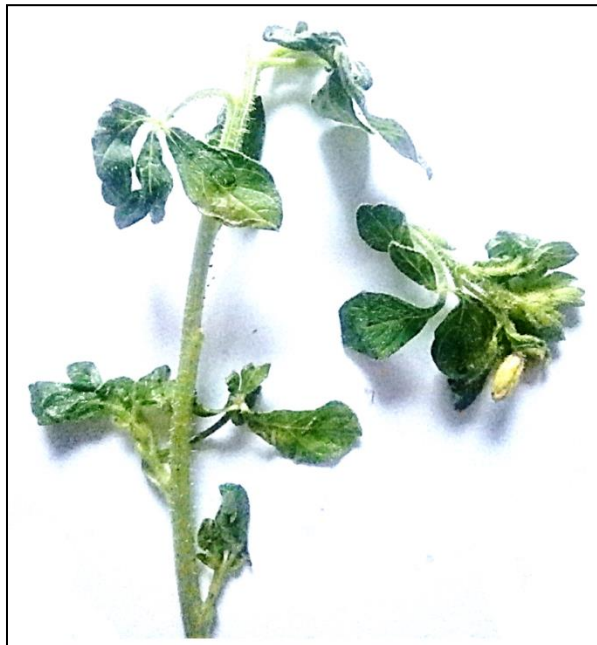

Supplement: s1 [file s1]
